# Supplementary material
Source: PubMed Central journal article supplement (PMC5600158)
Supplement: NIHMS902138-supplement-ESI.pdf [file NIHMS902138-supplement-ESI.pdf]

Cite this: DOI: 10.1039/xxxxxxxxxx

## Supplementary Information For All-atom MD indicates ion-dependent behavior of therapeutic F10

Ryan L. Melvin,<sup>\*a,b</sup> William H. Gmeiner,<sup>c</sup> and Freddie R. Salsbury, Jr<sup>a</sup>

Received Date

Accepted Date

DOI: 10.1039/xxxxxxxxxx

[www.rsc.org/journalname](http://www.rsc.org/journalname)

NC, USA.

<sup>c</sup> Department of Cancer Biology, Wake Forest University School of Medicine, Winston Salem, NC, USA.

<sup>a</sup> Department of Physics, Wake Forest University, Winston Salem, NC, USA. Fax: +1 (336) 758-6142; Tel: +1 (336) 758-5337; E-mail: [salsbufr@wfu.edu](mailto:salsbufr@wfu.edu)

<sup>b</sup> Department of Mathematics and Statistics, Wake Forest University, Winston Salem,

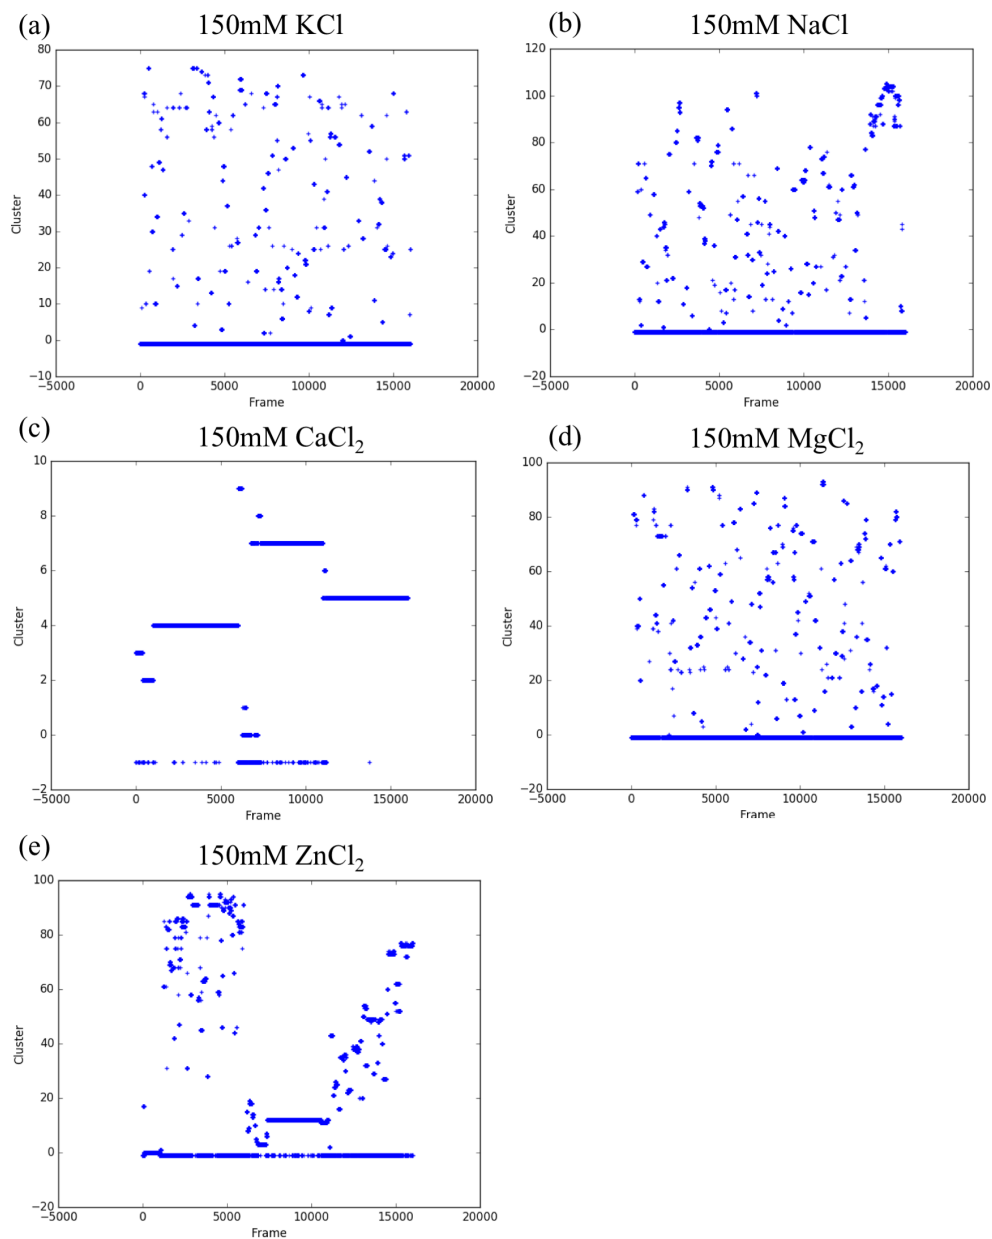

**Fig. 1** Plotting HDBSCAN clustering as timeseries indicates that calcium and zinc (c, e) induce long-lived (up to microseconds at a time) states for F10 while potassium, sodium and magnesium (a, b, d) have much shorter lived states (only a few nanoseconds).

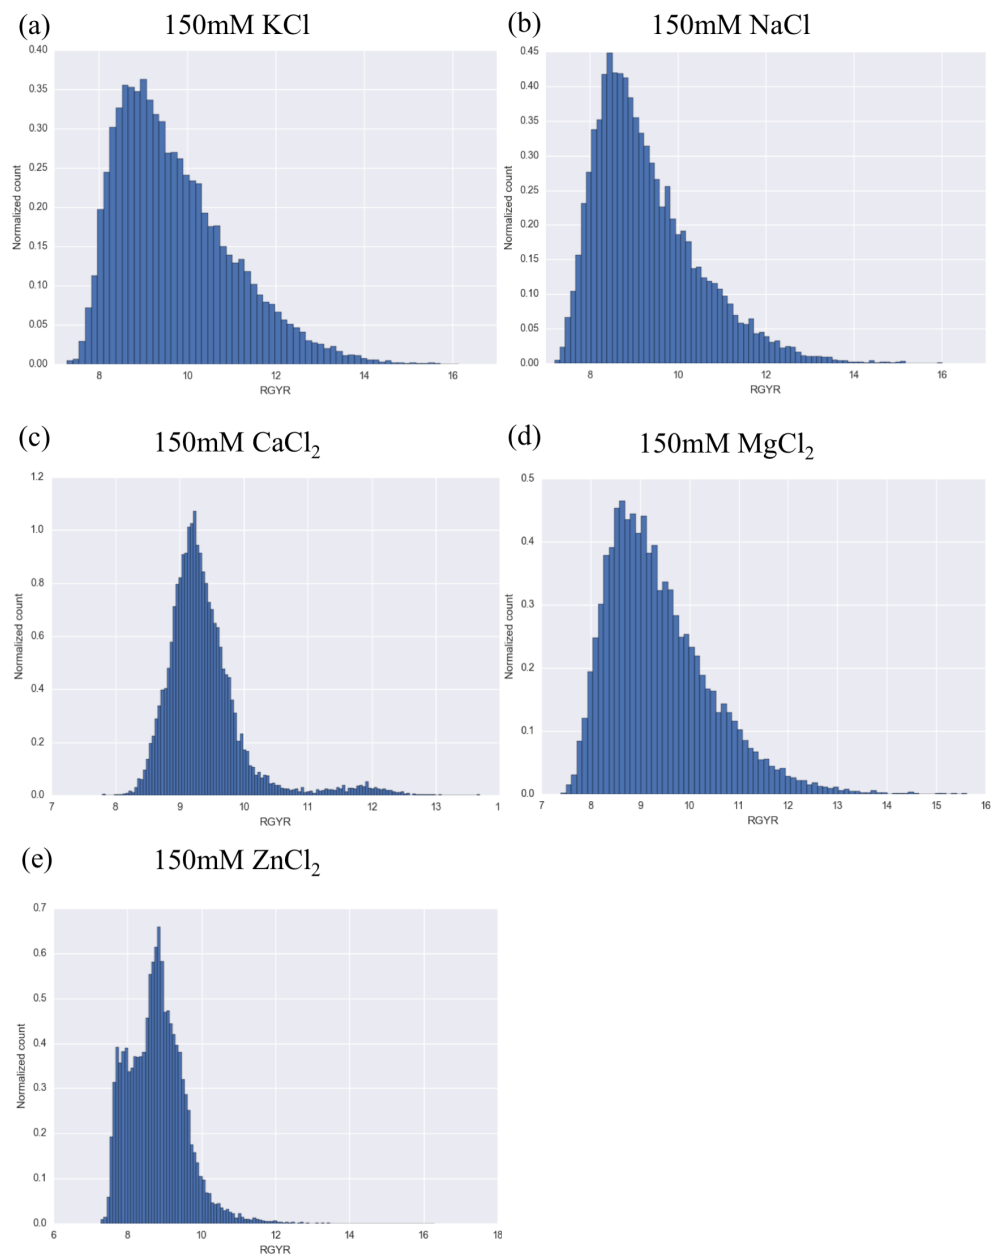

**Fig. 2** The largest observed persistence length occurs in simulations of F10 solvated in 150mM KCl. We see a similar pattern of compactness in terms of distributions of RGYR values.

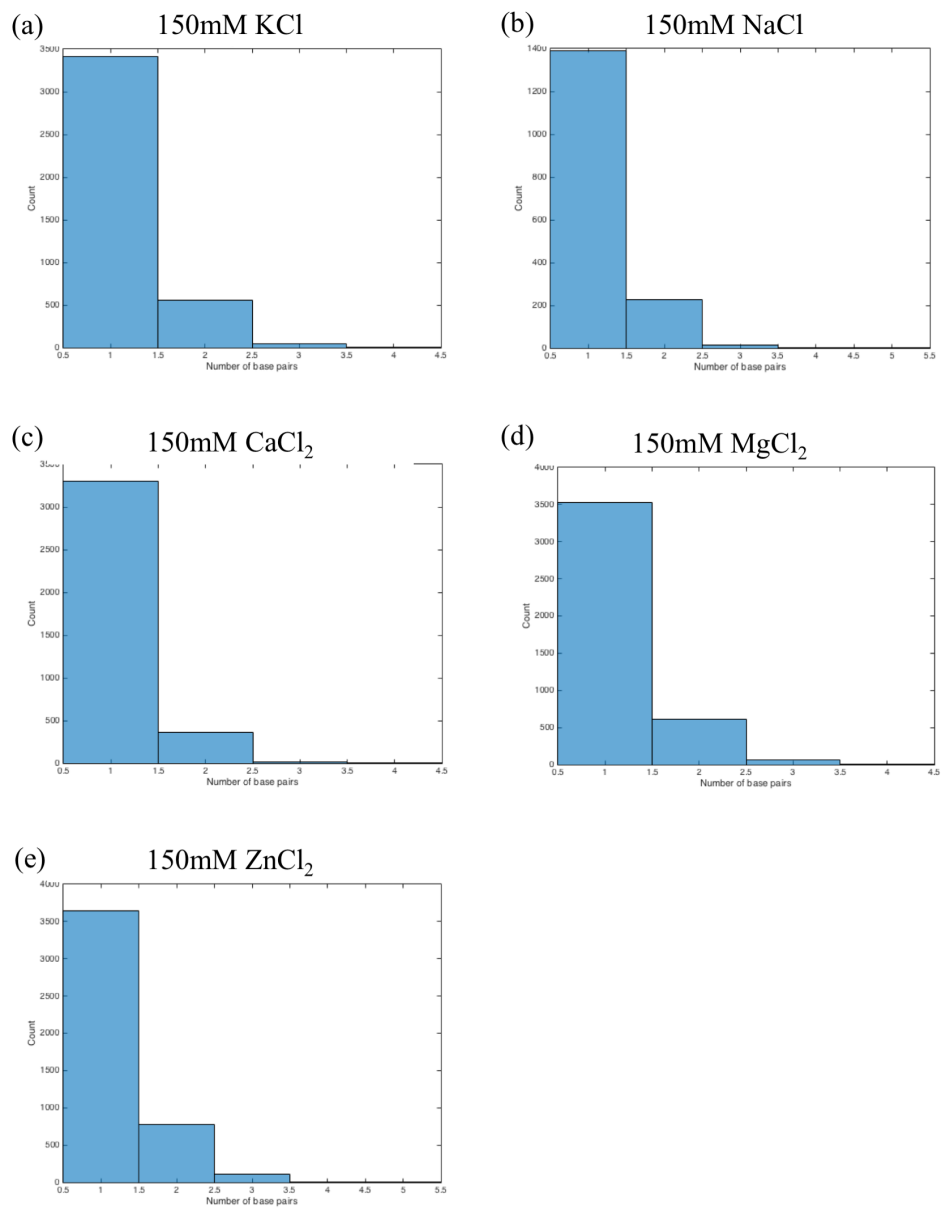

**Fig. 3** Histogram counts of base-base interactions in each trajectory frame reveals that F10 prefers single base-base interactions.
